# Supplementary material for: In vitro growth and differentiation of primary myoblasts on thiophene based conducting polymers
Source: Royal Society of Chemistry journal article supplement (doi:10.1039/c3bm60059a), 2013-01-01
Supplement: c3bm60059a.pdf [file c3bm60059a.pdf]

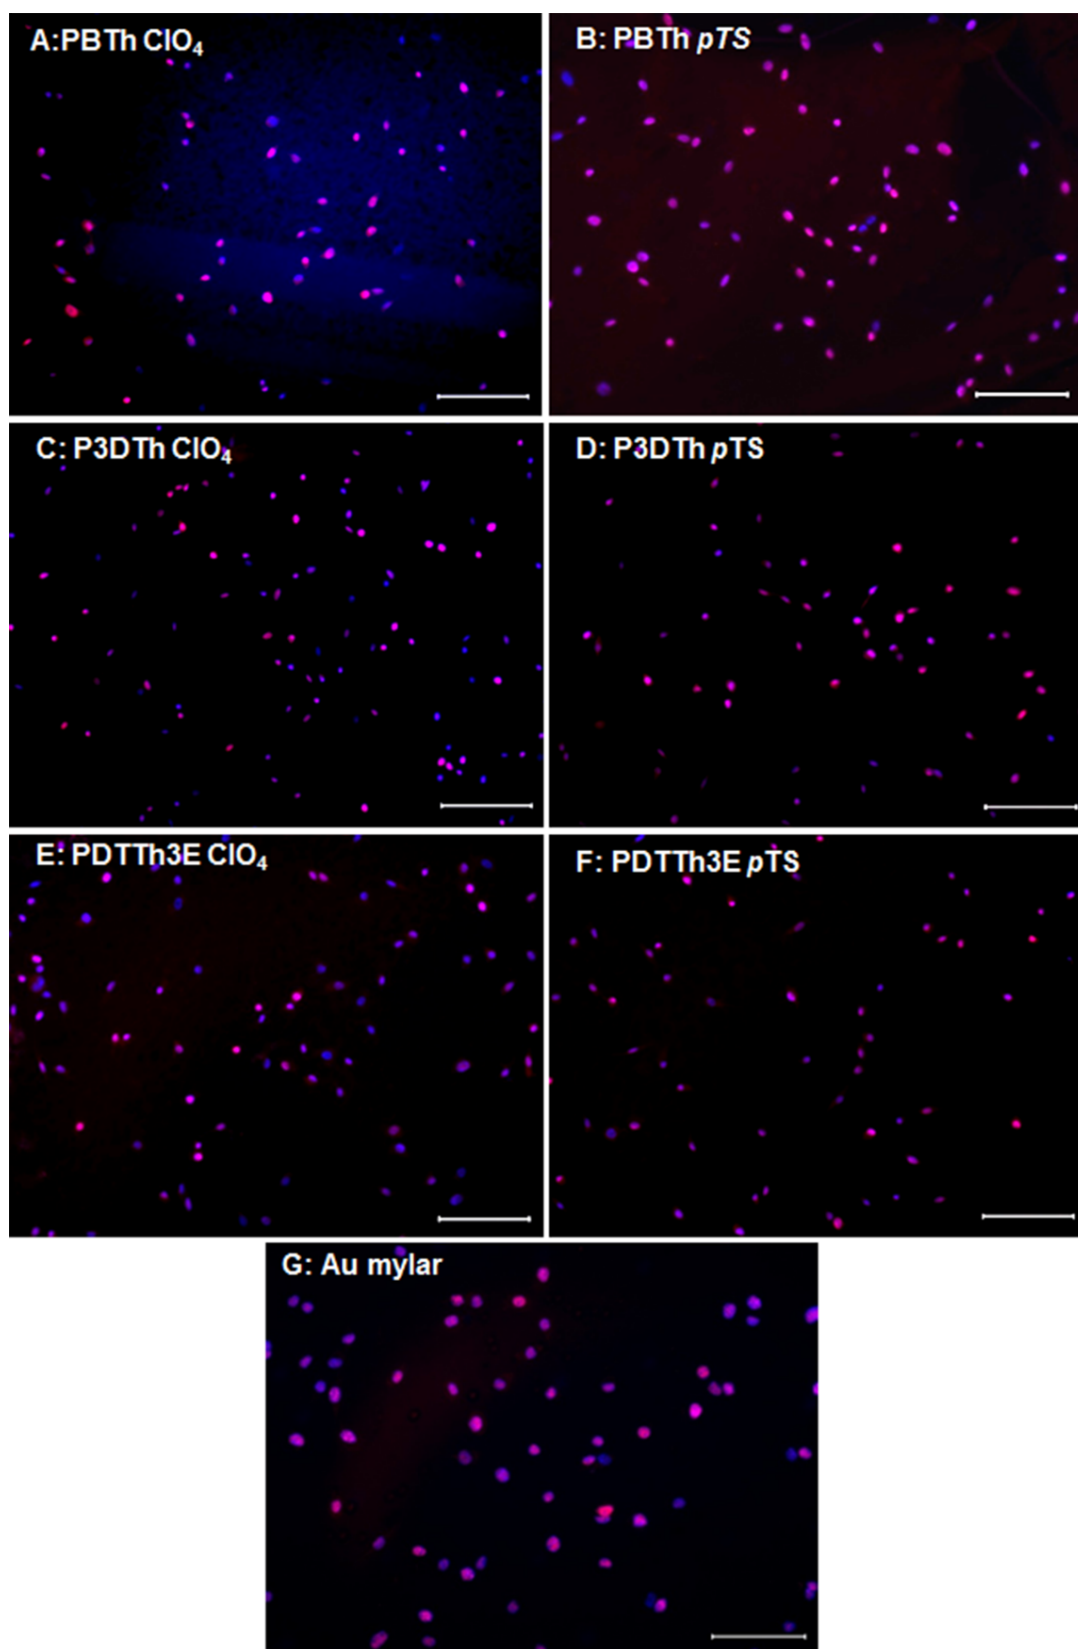

**Supplementary Fig. 1.** PCNA staining of myoblasts on polymer surfaces (A-F) and gold coated mylar (G). Replicating myoblasts can be seen on all polymer surfaces. Scale bars represent 100  $\mu$ m.
